# Supplementary material for: Effectiveness of Face Coverings in Mitigating the COVID-19 Pandemic in the United States
Source: MDPI journal article supplement (doi:10.3390/ijerph18073666), 2021-04-01
Supplement: s1 [file s1]

## SUPPLEMENTARY FIGURE 1

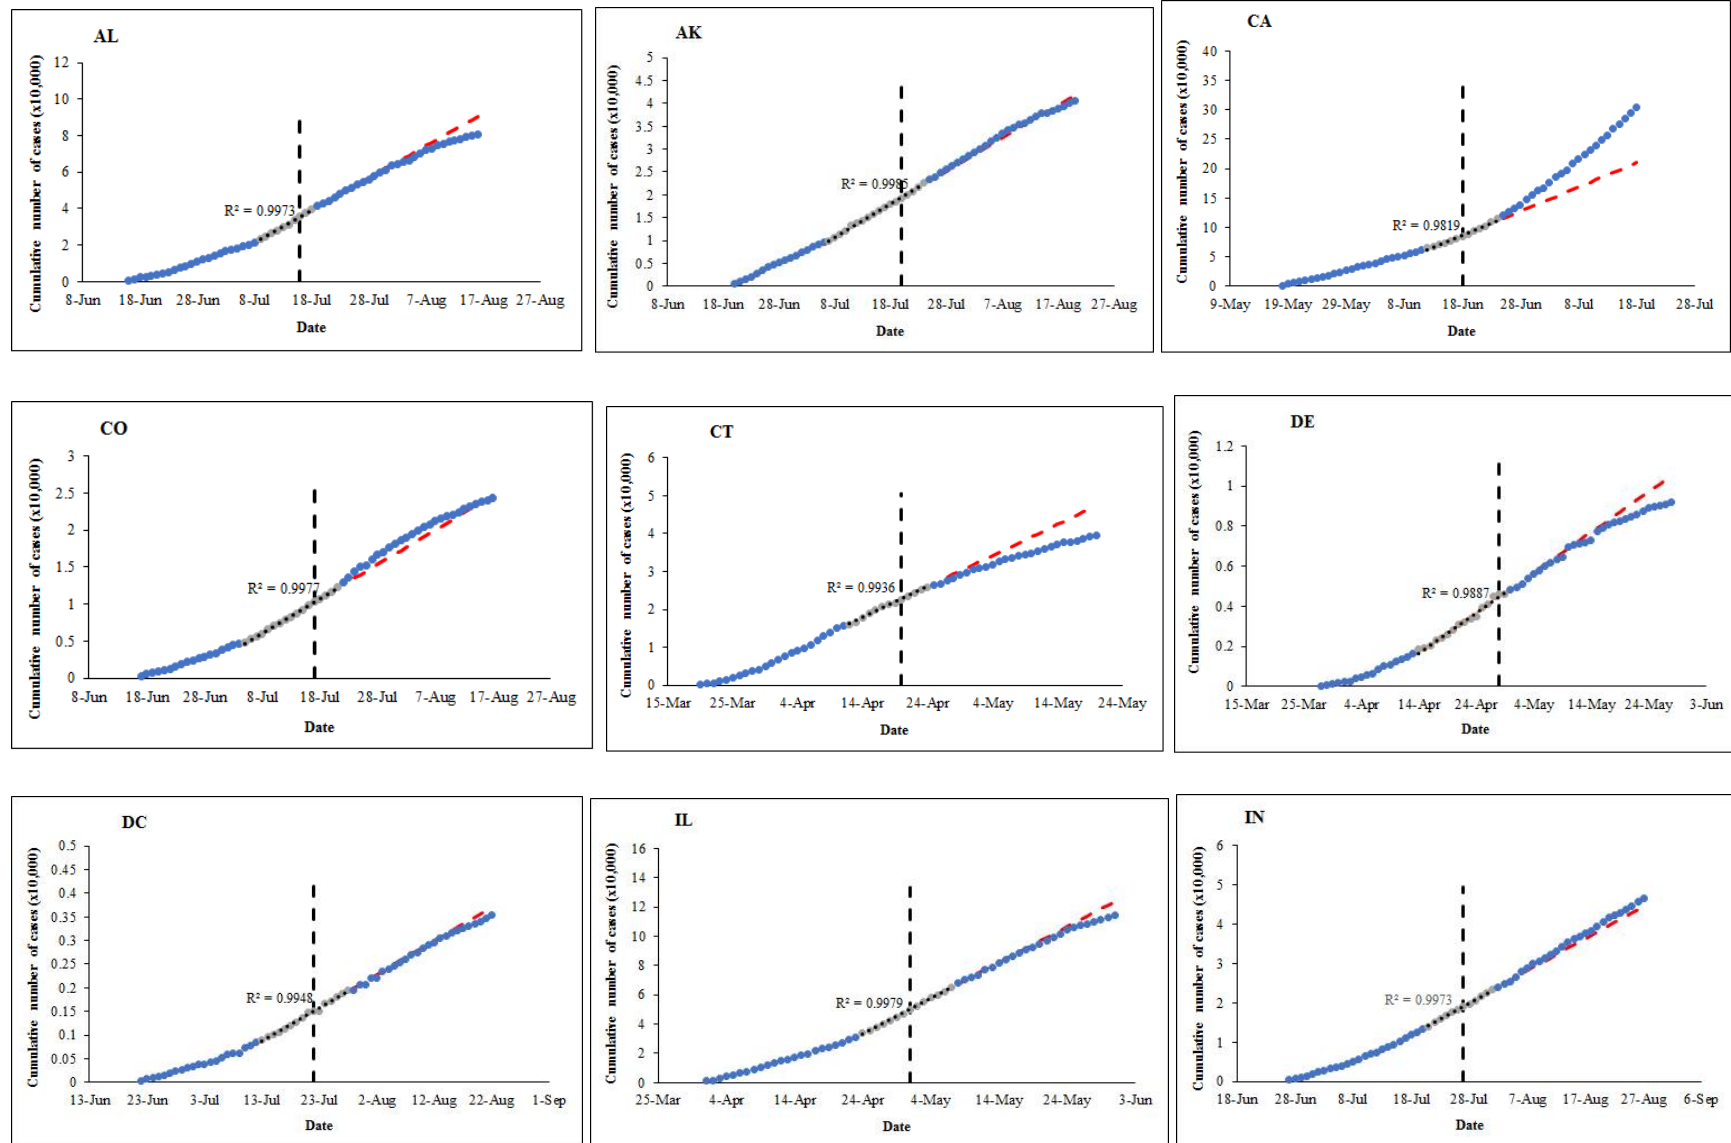

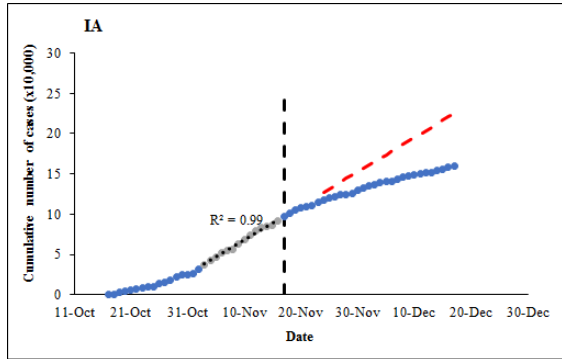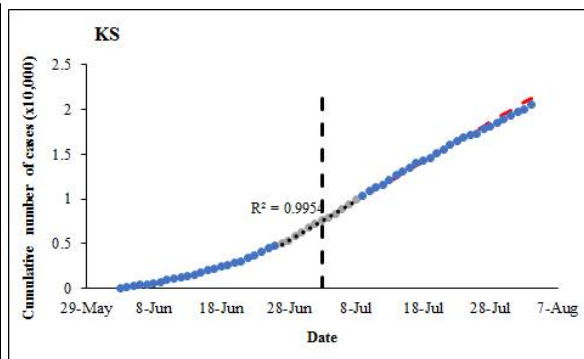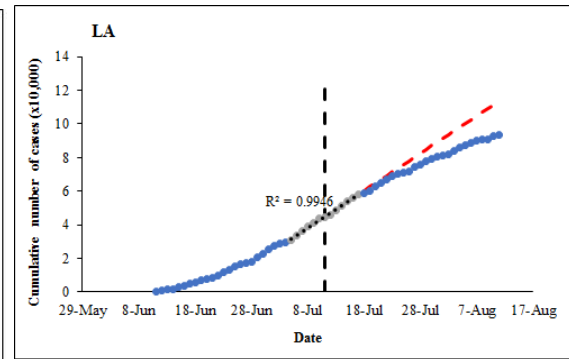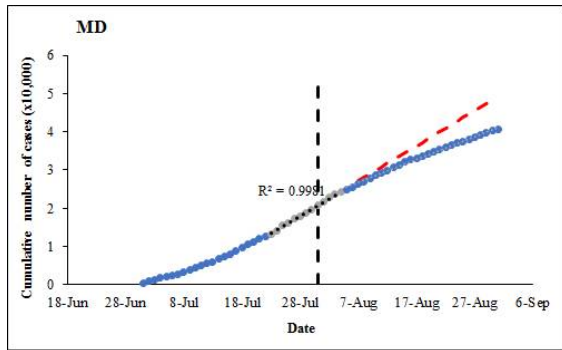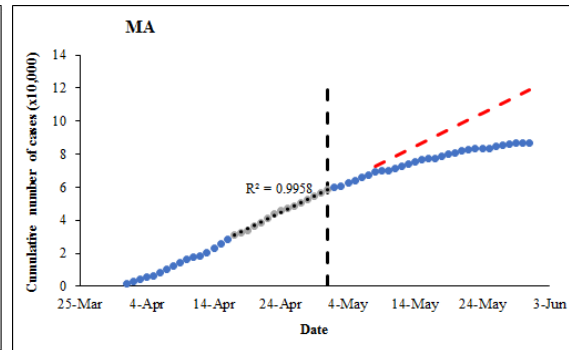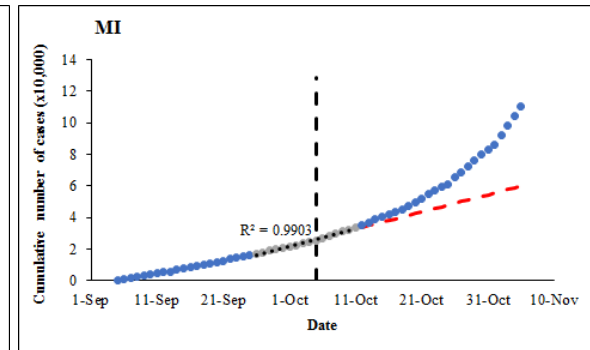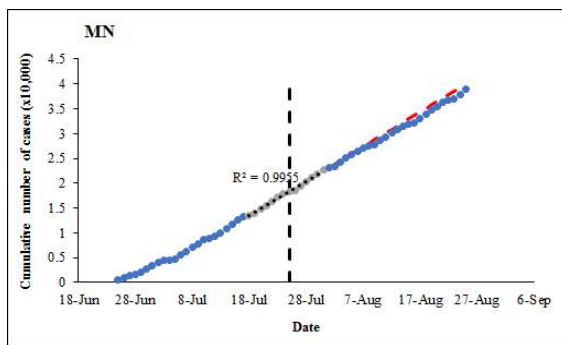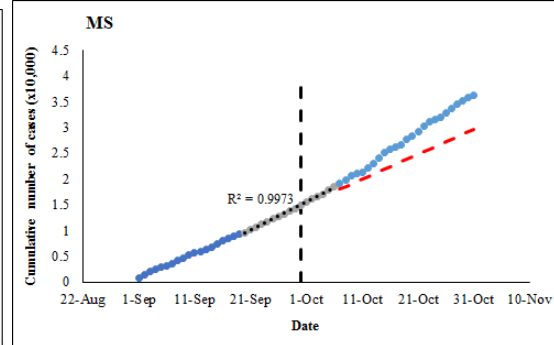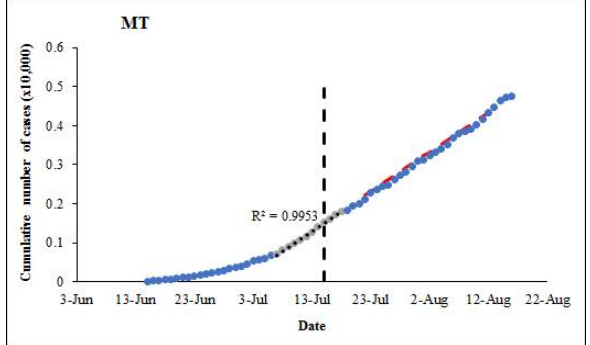

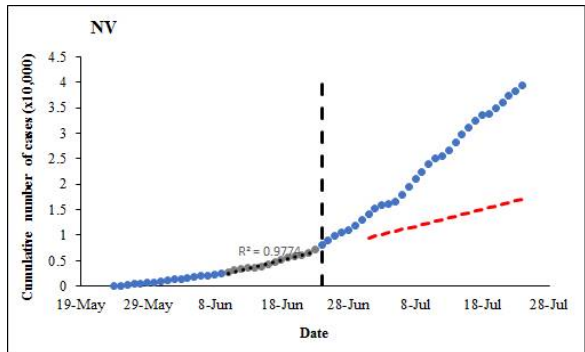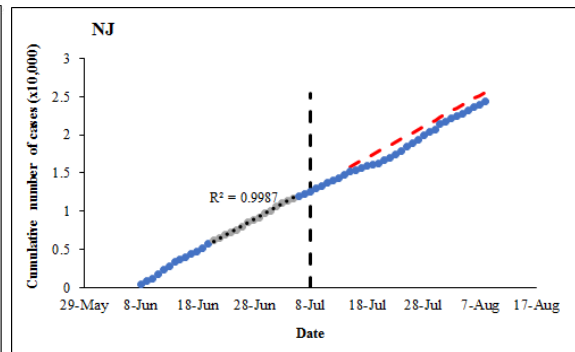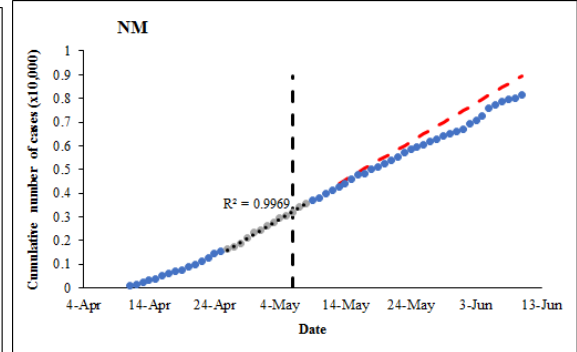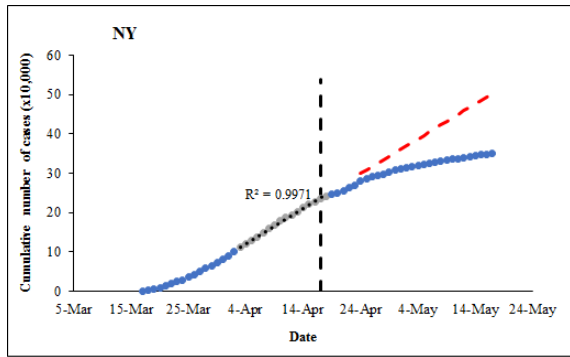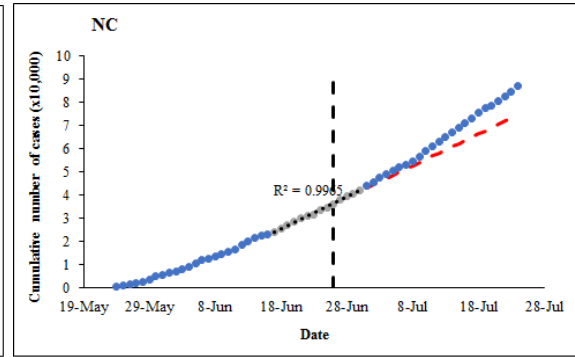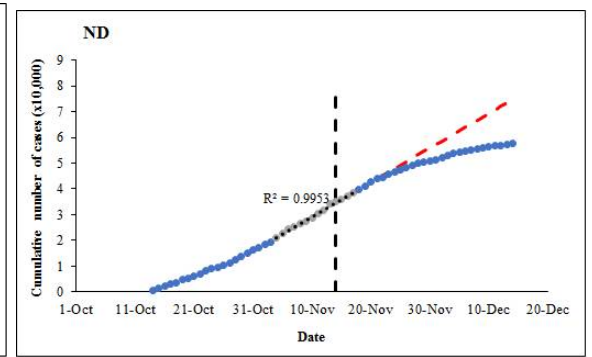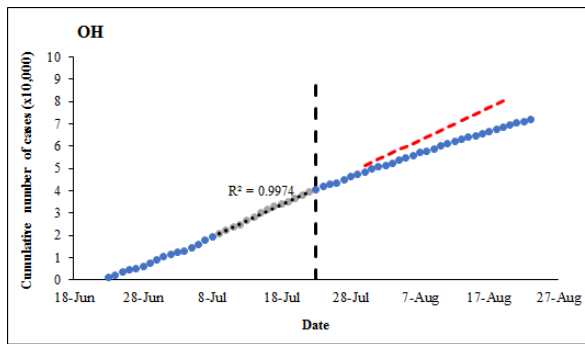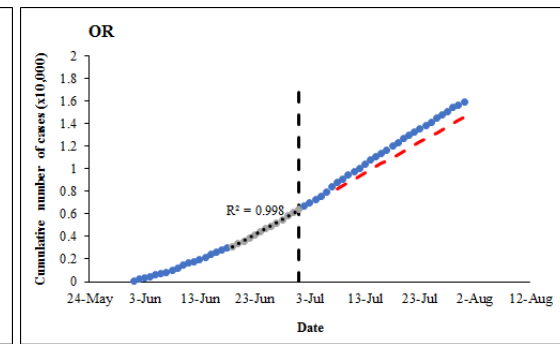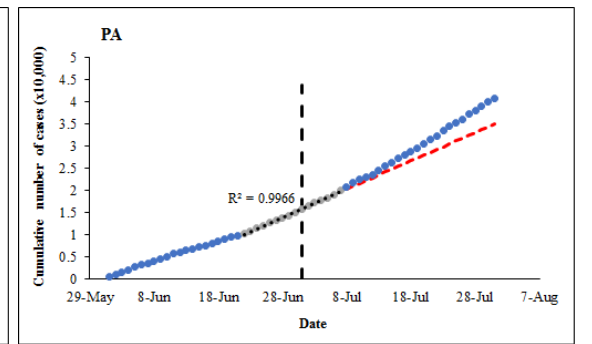

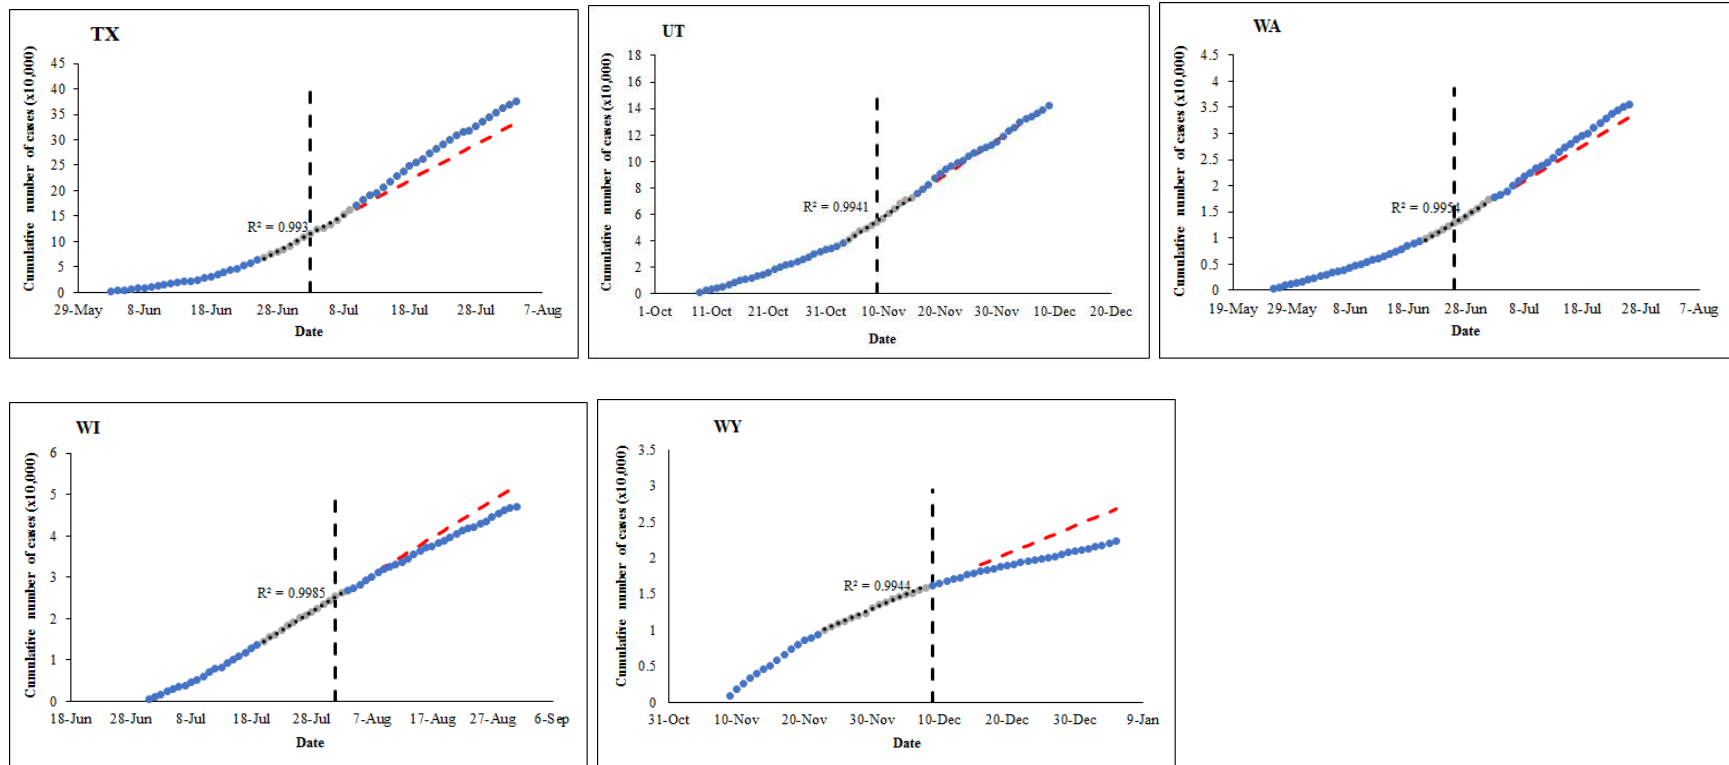

Supplementary Figure S1: Cumulative number of COVID-19 cases (y-axis) in U.S. states over time (x-axis). The chart is showing trend of cases (blue dotted line) for one month pre- and post- FC mandate (total = 2 months) for each state with face coverings mandate. The black vertical line is the date when face coverings order was passed. The gray segment through the case data was used to derive regression equation (black dotted line) that was used to project the number of cases (red line) that would have been recorded if FC order were not passed. The prediction was limited to 28 days post FC order to limit variation. Seven days post FC mandate was omitted from the prediction because the incubation period of COVID-19 is estimated to be 5 days.

Supplementary Table S1: U.S. states with and without state-wide order mandating the wearing of face coverings in public places. Data on confirmed COVID-19 cases were collected from or through the websites of the Department of Public Health of each state.

| State/Code       | State-wide order | Effective date | Sources – daily cases and cumulative infection cases data                                                                                                                                                                             | Face covering mandates                                                                                                                                                                                                                                                                                                                                                                                                                                                                                                                                                                                 |
|------------------|------------------|----------------|---------------------------------------------------------------------------------------------------------------------------------------------------------------------------------------------------------------------------------------|--------------------------------------------------------------------------------------------------------------------------------------------------------------------------------------------------------------------------------------------------------------------------------------------------------------------------------------------------------------------------------------------------------------------------------------------------------------------------------------------------------------------------------------------------------------------------------------------------------|
| Alabama [AL]     | Yes              | July 16        | <a href="https://www.alabamapublichealth.gov/covid19/index.html">https://www.alabamapublichealth.gov/covid19/index.html</a>                                                                                                           | <a href="https://governor.alabama.gov/assets/2020/12/Safer-at-Home-Order-Final-12.9.2020.pdf">https://governor.alabama.gov/assets/2020/12/Safer-at-Home-Order-Final-12.9.2020.pdf</a>                                                                                                                                                                                                                                                                                                                                                                                                                  |
| Alaska [AK]      | No               |                |                                                                                                                                                                                                                                       |                                                                                                                                                                                                                                                                                                                                                                                                                                                                                                                                                                                                        |
| Arizona [AZ]     | No               |                |                                                                                                                                                                                                                                       |                                                                                                                                                                                                                                                                                                                                                                                                                                                                                                                                                                                                        |
| Arkansas [AR]    | Yes              | July 20        | <a href="https://www.healthy.arkansas.gov/programs-services/topics/novel-coronavirus">https://www.healthy.arkansas.gov/programs-services/topics/novel-coronavirus</a>                                                                 | <a href="https://governor.arkansas.gov/images/uploads/executiveOrders/EO_20-43.pdf">https://governor.arkansas.gov/images/uploads/executiveOrders/EO_20-43.pdf</a>                                                                                                                                                                                                                                                                                                                                                                                                                                      |
| California [CA]  | Yes              | June 18        | <a href="https://covid19.ca.gov/state-dashboard/">https://covid19.ca.gov/state-dashboard/</a>                                                                                                                                         | <a href="https://www.cdph.ca.gov/Programs/CID/DCDC/CDPH%20Document%20Library/COVID-19/Guidance-for-Face-Coverings_06-18-2020.pdf">https://www.cdph.ca.gov/Programs/CID/DCDC/CDPH%20Document%20Library/COVID-19/Guidance-for-Face-Coverings_06-18-2020.pdf</a>                                                                                                                                                                                                                                                                                                                                          |
| Colorado [CO]    | Yes              | July 17        | <a href="https://covid19.colorado.gov/data">https://covid19.colorado.gov/data</a>                                                                                                                                                     | <a href="https://www.colorado.gov/governor/sites/default/files/inline-files/D%202020%20138%20Mask%20Order.pdf">https://www.colorado.gov/governor/sites/default/files/inline-files/D%202020%20138%20Mask%20Order.pdf</a>                                                                                                                                                                                                                                                                                                                                                                                |
| Connecticut [CT] | Yes              | April 20       | <a href="https://data.ct.gov/Health-and-Human-Services/COVID-19-daily-and-cumulative-cases-hospitalization/5dch-cm68">https://data.ct.gov/Health-and-Human-Services/COVID-19-daily-and-cumulative-cases-hospitalization/5dch-cm68</a> | <a href="https://portal.ct.gov/-/media/Office-of-the-Governor/Executive-Orders/Lamont-Executive-Orders/Executive-Order-No-7BB.pdf?la=en">https://portal.ct.gov/-/media/Office-of-the-Governor/Executive-Orders/Lamont-Executive-Orders/Executive-Order-No-7BB.pdf?la=en</a>                                                                                                                                                                                                                                                                                                                            |
| Delaware [DE]    | Yes              | April 28       | <a href="https://myhealthcommunity.dhss.delaware.gov/locations/state">https://myhealthcommunity.dhss.delaware.gov/locations/state</a>                                                                                                 | <a href="https://governor.delaware.gov/health-soe/twenty-seventh-modification-state-of-emergency-declaration/">https://governor.delaware.gov/health-soe/twenty-seventh-modification-state-of-emergency-declaration/</a><br><a href="https://governor.delaware.gov/health-soe/thirteenth-state-of-emergency/">https://governor.delaware.gov/health-soe/thirteenth-state-of-emergency/</a><br><a href="https://coronavirus.delaware.gov/guidance-for-face-coverings/">https://coronavirus.delaware.gov/guidance-for-face-coverings/</a>                                                                  |
| DC               | Yes              | July 22        | <a href="https://coronavirus.dc.gov/data">https://coronavirus.dc.gov/data</a>                                                                                                                                                         | <a href="https://coronavirus.dc.gov/maskorder">https://coronavirus.dc.gov/maskorder</a>                                                                                                                                                                                                                                                                                                                                                                                                                                                                                                                |
| Florida [FL]     | No               |                |                                                                                                                                                                                                                                       |                                                                                                                                                                                                                                                                                                                                                                                                                                                                                                                                                                                                        |
| Georgia [GA]     | No               |                |                                                                                                                                                                                                                                       |                                                                                                                                                                                                                                                                                                                                                                                                                                                                                                                                                                                                        |
| Hawaii [HI]      | Yes              |                | -                                                                                                                                                                                                                                     | <a href="https://governor.hawaii.gov/wp-content/uploads/2020/10/2010095-ATG_Fourteenth-Proclamation-for-COVID-19-distribution-signed.pdf">https://governor.hawaii.gov/wp-content/uploads/2020/10/2010095-ATG_Fourteenth-Proclamation-for-COVID-19-distribution-signed.pdf</a><br><a href="https://governor.hawaii.gov/wp-content/uploads/2020/11/2011051-ATG_Fifteenth-Proclamation-Related-to-the-COVID-19-Emergency-distribution-signed.pdf">https://governor.hawaii.gov/wp-content/uploads/2020/11/2011051-ATG_Fifteenth-Proclamation-Related-to-the-COVID-19-Emergency-distribution-signed.pdf</a> |
| Idaho [ID]       | No               |                |                                                                                                                                                                                                                                       |                                                                                                                                                                                                                                                                                                                                                                                                                                                                                                                                                                                                        |
| Illinois [IL]    | Yes              | May 1          | <a href="https://www.dph.illinois.gov/covid19/covid19-statistics">https://www.dph.illinois.gov/covid19/covid19-statistics</a>                                                                                                         | <a href="https://www.dph.illinois.gov/covid19/community-guidance/mask-use">https://www.dph.illinois.gov/covid19/community-guidance/mask-use</a><br><a href="https://www2.illinois.gov/Pages/Executive-Orders/ExecutiveOrder2020-32.aspx">https://www2.illinois.gov/Pages/Executive-Orders/ExecutiveOrder2020-32.aspx</a>                                                                                                                                                                                                                                                                               |
| Indiana [IN]     | Yes              | July 27        | <a href="https://www.coronavirus.in.gov/2393.htm">https://www.coronavirus.in.gov/2393.htm</a>                                                                                                                                         | <a href="https://www.in.gov/gov/files/Executive_Order_20-48_Color-Coded_County_Assessments.pdf">https://www.in.gov/gov/files/Executive_Order_20-48_Color-Coded_County_Assessments.pdf</a>                                                                                                                                                                                                                                                                                                                                                                                                              |
| Iowa [IA]        | Yes              | Nov 17         | <a href="https://coronavirus.iowa.gov/pages/case-counts">https://coronavirus.iowa.gov/pages/case-counts</a>                                                                                                                           | <a href="https://governor.iowa.gov/sites/default/files/documents/Public%20Health%20Proclamation%20-%202020.12.09.pdf">https://governor.iowa.gov/sites/default/files/documents/Public%20Health%20Proclamation%20-%202020.12.09.pdf</a>                                                                                                                                                                                                                                                                                                                                                                  |
| Kansas [KS]      | Yes              | Jul 3          | <a href="https://www.coronavirus.kdheks.gov/160/COVID-19-in-Kansas">https://www.coronavirus.kdheks.gov/160/COVID-19-in-Kansas</a>                                                                                                     | <a href="https://governor.kansas.gov/wp-content/uploads/2020/11/EO-20-68-Face-Coverings-protocol-Executed-1.pdf">https://governor.kansas.gov/wp-content/uploads/2020/11/EO-20-68-Face-Coverings-protocol-Executed-1.pdf</a><br><a href="https://governor.kansas.gov/wp-content/uploads/2020/07/20200702093130003.pdf">https://governor.kansas.gov/wp-content/uploads/2020/07/20200702093130003.pdf</a>                                                                                                                                                                                                 |
| Kentucky [KY]    | Yes              | July 9         | -                                                                                                                                                                                                                                     | <a href="https://governor.ky.gov/attachments/20201203_Executive-Order_2020-996_Face-coverings.pdf">https://governor.ky.gov/attachments/20201203_Executive-Order_2020-996_Face-coverings.pdf</a>                                                                                                                                                                                                                                                                                                                                                                                                        |

|                     |     |          |                                                                                                                                                                                                                       |                                                                                                                                                                                                                                                                                                                                                                                                                                                                                                   |
|---------------------|-----|----------|-----------------------------------------------------------------------------------------------------------------------------------------------------------------------------------------------------------------------|---------------------------------------------------------------------------------------------------------------------------------------------------------------------------------------------------------------------------------------------------------------------------------------------------------------------------------------------------------------------------------------------------------------------------------------------------------------------------------------------------|
| Louisiana [LA]      | Yes | July 11  | <a href="https://ldh.la.gov/Coronavirus/">https://ldh.la.gov/Coronavirus/</a>                                                                                                                                         | <a href="https://gov.louisiana.gov/assets/Proclamations/2020/168-JBE-2020-State-of-Emergency-Renewing-COVID-19.pdf">https://gov.louisiana.gov/assets/Proclamations/2020/168-JBE-2020-State-of-Emergency-Renewing-COVID-19.pdf</a>                                                                                                                                                                                                                                                                 |
| Maine [ME]          | Yes | May 1    | -                                                                                                                                                                                                                     | <a href="https://www.maine.gov/governor/mills/sites/maine.gov/governor.mills/files/inline-files/An%20Order%20to%20Revise%20Indoor%20Gathering%20Limits%2C%20Strengthen%20Face%20Covering%20Requirements%20and%20Delegate%20Certain%20Authority.pdf">https://www.maine.gov/governor/mills/sites/maine.gov/governor.mills/files/inline-files/An%20Order%20to%20Revise%20Indoor%20Gathering%20Limits%2C%20Strengthen%20Face%20Covering%20Requirements%20and%20Delegate%20Certain%20Authority.pdf</a> |
| Maryland [MD]       | Yes | July 31  | <a href="https://coronavirus.maryland.gov/">https://coronavirus.maryland.gov/</a>                                                                                                                                     | <a href="https://governor.maryland.gov/wp-content/uploads/2020/07/Gatherings-10th-AMENDED-7.29.20.pdf">https://governor.maryland.gov/wp-content/uploads/2020/07/Gatherings-10th-AMENDED-7.29.20.pdf</a>                                                                                                                                                                                                                                                                                           |
| Massachusetts [MA]  | Yes | May      | <a href="https://www.mass.gov/info-details/covid-19-response-reporting# covid-19-interactive-data-dashboard-">https://www.mass.gov/info-details/covid-19-response-reporting# covid-19-interactive-data-dashboard-</a> | <a href="https://www.mass.gov/doc/covid-19-order-55/download">https://www.mass.gov/doc/covid-19-order-55/download</a>                                                                                                                                                                                                                                                                                                                                                                             |
| Michigan [MI]       | Yes | Oct 5    | <a href="https://www.michigan.gov/coronavirus/0,9753,7-406-98163_98173---,00.html">https://www.michigan.gov/coronavirus/0,9753,7-406-98163_98173---,00.html</a>                                                       | <a href="https://www.michigan.gov/coronavirus/0,9753,7-406-98178_98455-543708--,00.html">https://www.michigan.gov/coronavirus/0,9753,7-406-98178_98455-543708--,00.html</a>                                                                                                                                                                                                                                                                                                                       |
| Minnesota [MN]      | Yes | July 25  | <a href="https://www.health.state.mn.us/diseases/coronavirus/situation.html#cases1">https://www.health.state.mn.us/diseases/coronavirus/situation.html#cases1</a>                                                     | <a href="https://www.leg.mn.gov/archive/execorders/20-81.pdf">https://www.leg.mn.gov/archive/execorders/20-81.pdf</a>                                                                                                                                                                                                                                                                                                                                                                             |
| Mississippi [MS]    | Yes | Sep 30   | <a href="https://msdh.ms.gov/msdhsite/_static/14,21882,420,873.html">https://msdh.ms.gov/msdhsite/_static/14,21882,420,873.html</a>                                                                                   | <a href="https://www.sos.ms.gov/content/executiveorders/ExecutiveOrders/1536.pdf">https://www.sos.ms.gov/content/executiveorders/ExecutiveOrders/1536.pdf</a>                                                                                                                                                                                                                                                                                                                                     |
| Missouri [MO]       | No  |          |                                                                                                                                                                                                                       |                                                                                                                                                                                                                                                                                                                                                                                                                                                                                                   |
| Montana [MT]        | Yes | July 15  | <a href="https://covid19.mt.gov/">https://covid19.mt.gov/</a>                                                                                                                                                         | <a href="https://covid19.mt.gov/_docs/2020-11-17_Directive-on-Group-Size-and-Capacity-FINAL.pdf">https://covid19.mt.gov/_docs/2020-11-17_Directive-on-Group-Size-and-Capacity-FINAL.pdf</a>                                                                                                                                                                                                                                                                                                       |
| Nebraska [NE]       | No  |          |                                                                                                                                                                                                                       |                                                                                                                                                                                                                                                                                                                                                                                                                                                                                                   |
| Nevada [NV]         | Yes | June 24  | <a href="https://nvhealthresponse.nv.gov/#covid-data-tracker">https://nvhealthresponse.nv.gov/#covid-data-tracker</a>                                                                                                 | <a href="https://nvhealthresponse.nv.gov/wp-content/uploads/2020/06/Directive-024-Face-Coverings.pdf">https://nvhealthresponse.nv.gov/wp-content/uploads/2020/06/Directive-024-Face-Coverings.pdf</a>                                                                                                                                                                                                                                                                                             |
| New Hampshire [NH]  | Yes | Nov 20   | -                                                                                                                                                                                                                     | <a href="https://www.governor.nh.gov/sites/g/files/ehbemt336/files/documents/emergency-order-74.pdf">https://www.governor.nh.gov/sites/g/files/ehbemt336/files/documents/emergency-order-74.pdf</a>                                                                                                                                                                                                                                                                                               |
| New Jersey [NJ]     | Yes | July 8   | <a href="https://covid19.nj.gov/">https://covid19.nj.gov/</a>                                                                                                                                                         | <a href="https://nj.gov/infobank/eo/056murphy/pdf/EO-163.pdf">https://nj.gov/infobank/eo/056murphy/pdf/EO-163.pdf</a>                                                                                                                                                                                                                                                                                                                                                                             |
| New Mexico [NM]     | Yes | May 6    | <a href="https://cvprovider.nmhealth.org/public-dashboard.html">https://cvprovider.nmhealth.org/public-dashboard.html</a>                                                                                             | <a href="https://www.governor.state.nm.us/wp-content/uploads/2020/05/05_15_2020_PHO.pdf">https://www.governor.state.nm.us/wp-content/uploads/2020/05/05_15_2020_PHO.pdf</a>                                                                                                                                                                                                                                                                                                                       |
| New York [NY]       | Yes | April 17 | <a href="https://coronavirus.health.ny.gov/home">https://coronavirus.health.ny.gov/home</a>                                                                                                                           | <a href="https://www.governor.ny.gov/news/no-20217-continuing-temporary-suspension-and-modification-laws-relating-disaster-emergency">https://www.governor.ny.gov/news/no-20217-continuing-temporary-suspension-and-modification-laws-relating-disaster-emergency</a>                                                                                                                                                                                                                             |
| North Carolina [NC] | Yes | June     | <a href="https://covid19.ncdhhs.gov/dashboard/cases">https://covid19.ncdhhs.gov/dashboard/cases</a>                                                                                                                   | <a href="https://files.nc.gov/governor/documents/files/EO181-Modified-Stay-at-Home-Early-Closure-Order.pdf">https://files.nc.gov/governor/documents/files/EO181-Modified-Stay-at-Home-Early-Closure-Order.pdf</a>                                                                                                                                                                                                                                                                                 |
| North Dakota [ND]   | Yes | Nov 14   | <a href="https://www.health.nd.gov/diseases-conditions/coronavirus/north-dakota-coronavirus-cases">https://www.health.nd.gov/diseases-conditions/coronavirus/north-dakota-coronavirus-cases</a>                       | <a href="https://www.governor.nd.gov/sites/www/files/documents/executive-orders/SHO%20Order%202020-08%20Signed.pdf">https://www.governor.nd.gov/sites/www/files/documents/executive-orders/SHO%20Order%202020-08%20Signed.pdf</a>                                                                                                                                                                                                                                                                 |
| Ohio [OH]           | Yes | July 23  | <a href="https://coronavirus.ohio.gov/wps/portal/gov/covid-19/dashboards/overview/">https://coronavirus.ohio.gov/wps/portal/gov/covid-19/dashboards/overview/</a>                                                     | <a href="https://governor.ohio.gov/wps/portal/gov/governor/media/news-and-media/covid19-update-07222020">https://governor.ohio.gov/wps/portal/gov/governor/media/news-and-media/covid19-update-07222020</a>                                                                                                                                                                                                                                                                                       |
| Oklahoma [OK]       | No  |          |                                                                                                                                                                                                                       |                                                                                                                                                                                                                                                                                                                                                                                                                                                                                                   |
| Oregon [OR]         | Yes | July 1   | <a href="https://coronavirus.oregon.gov/Pages/default.aspx">https://coronavirus.oregon.gov/Pages/default.aspx</a>                                                                                                     | <a href="https://govstatus.egov.com/or-oha-face-coverings">https://govstatus.egov.com/or-oha-face-coverings</a>                                                                                                                                                                                                                                                                                                                                                                                   |
| Pennsylvania [PA]   | Yes | July 1   | <a href="https://www.health.pa.gov/topics/disease/coronavirus/Pages/Cases.aspx">https://www.health.pa.gov/topics/disease/coronavirus/Pages/Cases.aspx</a>                                                             | <a href="https://www.health.pa.gov/topics/Documents/Diseases%20and%20Conditions/Updated%20Order%20of%20the%20Secretary%20Requiring%20Universal%20Face%20Coverings.pdf">https://www.health.pa.gov/topics/Documents/Diseases%20and%20Conditions/Updated%20Order%20of%20the%20Secretary%20Requiring%20Universal%20Face%20Coverings.pdf</a>                                                                                                                                                           |

|                     |      |         |                                                                                                                                                                                                                                                                               |                                                                                                                                                                                                                                                                                                                                                                                                                                                                                       |
|---------------------|------|---------|-------------------------------------------------------------------------------------------------------------------------------------------------------------------------------------------------------------------------------------------------------------------------------|---------------------------------------------------------------------------------------------------------------------------------------------------------------------------------------------------------------------------------------------------------------------------------------------------------------------------------------------------------------------------------------------------------------------------------------------------------------------------------------|
| South Carolina [SC] | No   |         |                                                                                                                                                                                                                                                                               |                                                                                                                                                                                                                                                                                                                                                                                                                                                                                       |
| South Dakota [SD]   | No   |         |                                                                                                                                                                                                                                                                               |                                                                                                                                                                                                                                                                                                                                                                                                                                                                                       |
| Tennessee [TN]      | No   |         |                                                                                                                                                                                                                                                                               |                                                                                                                                                                                                                                                                                                                                                                                                                                                                                       |
| Texas [TX]          | Yes  | July 3  | <a href="https://www.dshs.state.tx.us/coronavirus/">https://www.dshs.state.tx.us/coronavirus/</a>                                                                                                                                                                             | <a href="https://open.texas.gov/uploads/files/organization/opentexas/EO-GA-29-use-of-face-coverings-during-COVID-19-IMAGE-07-02-2020.pdf">https://open.texas.gov/uploads/files/organization/opentexas/EO-GA-29-use-of-face-coverings-during-COVID-19-IMAGE-07-02-2020.pdf</a>                                                                                                                                                                                                         |
| Utah [UT]           | Yes  | Nov 9   | <a href="https://coronavirus.utah.gov/case-counts/">https://coronavirus.utah.gov/case-counts/</a>                                                                                                                                                                             | <a href="https://coronavirus-download.utah.gov/Health/UPHO-2020-26-Updated-Statewide-COVID-19-Restrictions.pdf">https://coronavirus-download.utah.gov/Health/UPHO-2020-26-Updated-Statewide-COVID-19-Restrictions.pdf</a>                                                                                                                                                                                                                                                             |
| Vermont [VT]        | Yes  | Aug 1   | -                                                                                                                                                                                                                                                                             | <a href="https://governor.vermont.gov/sites/scott/files/documents/ADDENDUM%202%20TO%20AMENDED%20AND%20RESTATED%20EXECUTIVE%20ORDER%20NO.%2001-20.pdf">https://governor.vermont.gov/sites/scott/files/documents/ADDENDUM%202%20TO%20AMENDED%20AND%20RESTATED%20EXECUTIVE%20ORDER%20NO.%2001-20.pdf</a>                                                                                                                                                                                 |
| Virginia [VA]       | Yes  | Dec 14  | -                                                                                                                                                                                                                                                                             | <a href="https://www.governor.virginia.gov/media/governorviriniagov/executive-actions/EO-72-and-Order-of-Public-Health-Emergency-Nine-Common-Sense-Surge-Restrictions-Certain-Temporary-Restrictions-Due-to-Novel-Coronavirus-[COVID-19].pdf">https://www.governor.virginia.gov/media/governorviriniagov/executive-actions/EO-72-and-Order-of-Public-Health-Emergency-Nine-Common-Sense-Surge-Restrictions-Certain-Temporary-Restrictions-Due-to-Novel-Coronavirus-[COVID-19].pdf</a> |
| Washington [WA]     | Yes  | June 26 | <a href="https://www.doh.wa.gov/Emergencies/COVID19/DataDashboard">https://www.doh.wa.gov/Emergencies/COVID19/DataDashboard</a>                                                                                                                                               | <a href="https://www.doh.wa.gov/Portals/1/Documents/1600/coronavirus/ClothFacemasks.pdf">https://www.doh.wa.gov/Portals/1/Documents/1600/coronavirus/ClothFacemasks.pdf</a>                                                                                                                                                                                                                                                                                                           |
| West Virginia [WV]  | Yes! | Dec 14  | -                                                                                                                                                                                                                                                                             | <a href="https://governor.wv.gov/Pages/Statewide-Indoor-Face-Covering-Requirement.aspx">https://governor.wv.gov/Pages/Statewide-Indoor-Face-Covering-Requirement.aspx</a>                                                                                                                                                                                                                                                                                                             |
| Wisconsin [WI]      | Yes  | Aug 1   | <a href="https://www.dhs.wisconsin.gov/covid-19/cases.htm">https://www.dhs.wisconsin.gov/covid-19/cases.htm</a>                                                                                                                                                               | <a href="https://content.govdelivery.com/attachments/WIGOV/2020/11/20/file_attachments/1607585/Em001-NovFaceCovering.pdf">https://content.govdelivery.com/attachments/WIGOV/2020/11/20/file_attachments/1607585/Em001-NovFaceCovering.pdf</a>                                                                                                                                                                                                                                         |
| Wyoming [WY]        | Yes  | Dec 9   | <a href="https://health.wyo.gov/publichealth/infectious-disease-epidemiology-unit/disease/novel-coronavirus/covid-19-map-and-statistics/">https://health.wyo.gov/publichealth/infectious-disease-epidemiology-unit/disease/novel-coronavirus/covid-19-map-and-statistics/</a> | <a href="https://health.wyo.gov/wp-content/uploads/2020/12/Order4_StatewideFaceCoveringOrder_Dec72020.pdf">https://health.wyo.gov/wp-content/uploads/2020/12/Order4_StatewideFaceCoveringOrder_Dec72020.pdf</a>                                                                                                                                                                                                                                                                       |

Supplementary Table S2: Change in trends of cases rate per 100,000 people during summer and fall exponential increase in daily cases and confirmed cumulative cases. Higher slopes indicate higher case rate and lower slopes indicate lower case rates.

| SN | States                | All data       |                          | Summer surge data |                          |        | Fall surge data |                          |        |
|----|-----------------------|----------------|--------------------------|-------------------|--------------------------|--------|-----------------|--------------------------|--------|
|    |                       | R <sup>2</sup> | Slope (d <sup>-1</sup> ) | R <sup>2</sup>    | Slope (d <sup>-1</sup> ) | R-LDS  | R <sup>2</sup>  | Slope (d <sup>-1</sup> ) | R-LDF  |
| 1  | Alabama               | 0.9425         | 24.555                   | 0.9899            | 27.364                   | 2989.6 | 0.9495          | 38.124                   | 6624.9 |
| 2  | Alaska <sup>a</sup>   | 0.7162         | 18.897                   | 0.9912            | 9.769                    | 950    | 0.9546          | 58.777                   | 5818.2 |
| 3  | Arizona <sup>a</sup>  | 0.9272         | 22.187                   | 0.8841            | 23.349                   | 2951.7 | 0.8550          | 34.016                   | 6338.3 |
| 4  | Arkansas              | 0.9090         | 24.652                   | 0.9982            | 21.886                   | 2550.9 | 0.9679          | 45.416                   | 6730.3 |
| 5  | California            | 0.8926         | 15.839                   | 0.9840            | 18.027                   | 1985   | 0.8129          | 24.569                   | 4789.3 |
| 6  | Colorado              | 0.7188         | 16.308                   | 0.9911            | 6.774                    | 1147   | 0.9286          | 51.867                   | 5401.1 |
| 7  | Connecticut           | 0.7403         | 11.886                   | 0.9901            | 3.0394                   | 1575.2 | 0.8973          | 34.373                   | 4694.6 |
| 8  | Delaware              | 0.8622         | 15.653                   | 0.9970            | 9.8417                   | 2029.3 | 0.881           | 33.07                    | 5243.2 |
| 9  | D of Columbia         | 0.9470         | 11.307                   | 0.9945            | 8.2233                   | 2128.4 | 0.9148          | 17.668                   | 3788.9 |
| 10 | Florida <sup>a</sup>  | 0.9632         | 21.976                   | 0.9471            | 31.396                   | 3165   | 0.9417          | 25.567                   | 5552.1 |
| 11 | Georgia <sup>a</sup>  | 0.9650         | 21.386                   | 0.9901            | 28.567                   | 3050.3 | 0.9402          | 25.815                   | 5570.4 |
| 12 | Idaho <sup>a</sup>    | 0.8493         | 26.123                   | 0.9867            | 22.087                   | 2145.8 | 0.9752          | 60.193                   | 7323.6 |
| 13 | Illinois              | 0.8210         | 23.058                   | 0.9801            | 12.537                   | 2205.4 | 0.9557          | 60.820                   | 7142.4 |
| 14 | Indiana               | 0.7628         | 21.664                   | 0.9904            | 11.899                   | 1672.9 | 0.9357          | 61.306                   | 6954.9 |
| 15 | Iowa                  | 0.8372         | 30.095                   | 0.9815            | 18.768                   | 2576.8 | 0.9607          | 75.765                   | 8498.3 |
| 16 | Kansas                | 0.8041         | 23.468                   | 0.9939            | 15.641                   | 1852.2 | 0.9471          | 60.535                   | 7022.9 |
| 17 | Kentucky              | 0.8032         | 18.262                   | 0.9887            | 12.353                   | 1404.1 | 0.9540          | 46.041                   | 5468.1 |
| 18 | Louisiana             | 0.967          | 21.970                   | 0.9605            | 28.590                   | 3511.7 | 0.9119          | 28.563                   | 6179.3 |
| 19 | Maryland              | 0.9365         | 13.659                   | 0.9942            | 10.871                   | 2006.3 | 0.9197          | 24.415                   | 4224.5 |
| 20 | Massachusetts         | 0.8135         | 12.112                   | 0.9943            | 4.6683                   | 1969.7 | 0.886           | 28.307                   | 4711.6 |
| 21 | Michigan              | 0.7486         | 15.042                   | 0.9947            | 6.9972                   | 1305.3 | 0.9328          | 45.611                   | 5017.7 |
| 22 | Minnesota             | 0.7659         | 23.052                   | 0.9958            | 11.465                   | 1633.1 | 0.9339          | 68.138                   | 7080.4 |
| 23 | Mississippi           | 0.9538         | 24.551                   | 0.9862            | 28.606                   | 3177.7 | 0.9491          | 36.579                   | 6642.5 |
| 24 | Missouri <sup>a</sup> | 0.8466         | 21.663                   | 0.9838            | 17.752                   | 1879.7 | 0.9718          | 49.097                   | 6001.1 |
| 25 | Montana               | 0.7211         | 24.952                   | 0.9878            | 10.226                   | 1019.9 | 0.9857          | 76.922                   | 7234.8 |
| 26 | Nebraska <sup>a</sup> | 0.8081         | 27.335                   | 0.9912            | 13.309                   | 2160.1 | 0.9652          | 74.254                   | 8121.5 |
| 27 | Nevada                | 0.8922         | 23.159                   | 0.9715            | 24.331                   | 2483.6 | 0.9183          | 45.909                   | 6684.2 |
| 28 | New Jersey            | 0.7932         | 13.291                   | 0.9978            | 4.2512                   | 2310.4 | 0.9115          | 34.738                   | 5406.5 |
| 29 | New Mexico            | 0.7427         | 19.359                   | 0.9699            | 9.3487                   | 1325.3 | 0.9289          | 58.788                   | 6238.4 |
| 30 | New York              | 0.8051         | 9.5751                   | 0.9994            | 3.4079                   | 2391.6 | 0.8734          | 21.314                   | 4480.0 |



|    |                             |        |        |        |        |        |        |        |         |
|----|-----------------------------|--------|--------|--------|--------|--------|--------|--------|---------|
| 31 | North Carolina              | 0.9295 | 16.559 | 0.9967 | 15.627 | 1904.1 | 0.9532 | 28.108 | 4611.4  |
| 32 | North Dakota                | 0.7695 | 43.635 | 0.9334 | 20.923 | 2490.7 | 0.9821 | 122.19 | 11869.5 |
| 33 | Ohio                        | 0.7456 | 16.245 | 0.9979 | 9.6734 | 1247.7 | 0.8978 | 45.863 | 5384.1  |
| 34 | Oklahoma <sup>a</sup>       | 0.8536 | 23.914 | 0.9926 | 21.371 | 2206.4 | 0.9512 | 49.480 | 6883.5  |
| 35 | Oregon                      | 0.8363 | 8.1504 | 0.9932 | 6.5497 | 742.4  | 0.9214 | 19.036 | 2460    |
| 36 | Pennsylvania                | 0.7363 | 12.191 | 0.9989 | 5.9357 | 1184.6 | 0.8753 | 33.771 | 4402.4  |
| 37 | South Carolina <sup>a</sup> | 0.9627 | 20.628 | 0.9768 | 24.303 | 2734.4 | 0.9516 | 26.540 | 5355.4  |
| 38 | South Dakota <sup>a</sup>   | 0.7611 | 37.554 | 0.8996 | 14.395 | 2169.1 | 0.9859 | 108.2  | 10747   |
| 39 | Tennessee <sup>a</sup>      | 0.8826 | 26.335 | 0.9931 | 25.286 | 2711.1 | 0.9369 | 50.819 | 7754.6  |
| 40 | Texas                       | 0.939  | 20.858 | 0.9823 | 23.242 | 2470.0 | 0.9629 | 34.542 | 5490.3  |
| 41 | Utah                        | 0.8191 | 26.914 | 0.9906 | 14.972 | 2028.8 | 0.9685 | 68.465 | 7884.8  |
| 42 | Virginia                    | 0.9387 | 12.623 | 0.9966 | 11.185 | 1670.5 | 0.9359 | 20.928 | 3684.4  |
| 43 | Washington                  | 0.8727 | 9.468  | 0.9856 | 8.2791 | 1092.5 | 0.9046 | 20.046 | 2976.2  |
| 44 | West Virginia               | 0.7151 | 12.551 | 0.9892 | 7.0574 | 802.6  | 0.9110 | 35.433 | 4092.1  |
| 45 | Wisconsin                   | 0.7919 | 30.087 | 0.9909 | 14.47  | 1894.9 | 0.9849 | 81.488 | 8490.5  |
| 46 | Wyoming                     | 0.6671 | 23.171 | 0.9959 | 6.7687 | 866.7  | 0.9542 | 81.135 | 7277.3  |

Keys: a = states without face coverings mandate in public; d = rate of change in confirmed cases per day; R-LDS = case rate per 100,000 people on last day of summer 2020 (September 22); R-LDF = case rate per 100,000 people on last day of fall 2020 (December 21).
